1 **The chromatin remodelling factor Chd7 protects auditory neurons**  
2 **and sensory hair cells from stress-induced degeneration**

3

4 Mohi Ahmed<sup>1\*</sup>, Ruth Moon<sup>1</sup>, Ravindra Singh Prajapati<sup>1§</sup>, Elysia James<sup>2</sup>, M. Albert Basson<sup>1,3</sup>,  
5 Andrea Streit<sup>1\*</sup>

6

7

8 <sup>1</sup>Centre for Craniofacial and Regenerative Biology, Floor 27 Tower Wing, Guy's Hospital,  
9 King's College London, London, SE1 9RT, UK

10 <sup>2</sup>Wolfson Centre for Age-Related Diseases, Institute of Psychiatry, Psychology and  
11 Neuroscience, King's College London, London, SE1 1UL, UK

12 <sup>3</sup>MRC Centre for Neurodevelopmental Disorders, King's College London, London SE1 1UL,  
13 UK

14

15 \*Corresponding authors: [andrea.streit@kcl.ac.uk](mailto:andrea.streit@kcl.ac.uk), [mohi.ahmed@kcl.ac.uk](mailto:mohi.ahmed@kcl.ac.uk)

16

17 § current address: Leukaemia and Stem Cell Biology Group, School of Cancer and  
18 Pharmaceutical Sciences, King's College London, London, SE5 9NU, UK

19

20 Keywords:

21 CHARGE syndrome, Chromatin remodelling, Chromodomain helicase, Cochlea, Damage  
22 response, Degeneration, Epigenetics, Hair cells, Inner ear, Neurodevelopment,

23 Neurodegeneration, Organ of Corti, Oxidative stress, RNA-binding proteins, Sensorineural

24 hearing loss, Spiral ganglia neurons

25 **Neurons and sensory cells are particularly vulnerable to oxidative stress due to their**  
26 **high oxygen demand during stimulus perception and transmission<sup>1-4</sup>. The**  
27 **mechanisms that protect them from stress-induced death and degeneration remain**  
28 **elusive. Here we show that embryonic deletion of the chromodomain helicase DNA-**  
29 **binding protein 7 (CHD7) in auditory neurons or hair cells leads to sensorineural**  
30 **hearing loss due to postnatal degeneration of both cell types. Mechanistically, we**  
31 **demonstrate that *CHD7* controls the expression of major stress pathway components.**  
32 **In its absence, hair cells are hypersensitive, dying rapidly after brief exposure to**  
33 **stress inducers, suggesting that sound at the onset of hearing triggers their**  
34 **degeneration. In humans, *CHD7* haploinsufficiency causes CHARGE syndrome, a**  
35 **disorder affecting multiple organs including the ear<sup>5,6</sup>. Our findings suggest that *CHD7***  
36 **mutations cause developmentally silent phenotypes that predispose cells to postnatal**  
37 **degeneration due to a failure of protective mechanisms.**

38 Sensorineural hearing loss (SNHL) is a common feature of CHARGE syndrome, affecting 50-  
39 70% of individuals<sup>5,6</sup>. Mice with heterozygous *Chd7* mutations are an excellent model for  
40 CHARGE and, like humans, exhibit SNHL<sup>7-10</sup>. *Chd7* plays an important role during  
41 neurogenesis both in the brain and the inner ear<sup>9,11-16</sup>. At embryonic day (E) 9.5-E10.5,  
42 neuronal progenitors are reduced in the inner ear of *Chd7*<sup>+/-</sup> mutants, and *Chd7* is necessary  
43 for their proliferation<sup>9</sup>. However, by E11.5, the number of neuronal progenitors is restored  
44 and inner ear neurons as well as the hair cells they innervate appear normal after birth<sup>9,10</sup>.  
45 The cellular function of *Chd7* and the mechanisms underlying SNHL have yet to be  
46 elucidated.

47 In the cochlea, inner hair cells are responsible for sound perception, while outer hair cells  
48 modulate the sound amplitude<sup>17</sup>. They are innervated by type I and type II spiral ganglion  
49 neurons, respectively, which project to the auditory nuclei in the brain stem<sup>18</sup>. In mice, hair  
50 cell specification mediated by the transcription factor *Atoh1* occurs between E12.5 to

51 E16.5<sup>19,20</sup>. However, their development continues postnatally<sup>19</sup> and they reach maturity just  
52 before the onset of hearing between postnatal day 10 (P10) and P14<sup>21</sup>. To investigate its  
53 function in hair cells, we deleted *Chd7* using the hair cell-specific *Atoh1Cre* driver  
54 (*Atoh1Cre/+;Chd7flox*). Surprisingly, loss of *Chd7* in newly formed hair cells does not affect  
55 their development: hair cells appear normal at P8 (n=10/10; Figure S1a, S1b). Thereafter,  
56 rapid degeneration of inner hair cells becomes evident between P10 (n=6/8) and P14  
57 (n=15/16), while outer hair cells degenerate more slowly (Figures 1a-l, n, S1a, S1b). By P21,  
58 most inner hair cell nuclei are missing, pyknotic or fragmented, indicating progressive  
59 degeneration and cell death (n=8/8; Figures 1m, n, S1b). *Chd7* heterozygous mutants show  
60 equally severe phenotypes (Figure S1c) but at a reduced frequency (n=5/24). To establish  
61 when *Chd7* function is critical during hair cell formation, we used an inducible  
62 *Atoh1CreERT2*. Unlike *Chd7* deletion as soon as hair cells are specified, loss of *Chd7* after  
63 E16.5 does not cause postnatal hair cell degeneration (n=6/6; Figure S3b). These  
64 observations suggest that *Chd7* is required during hair cell development to maintain their  
65 survival upon the onset of hearing postnatally.

66 Postmitotic neural progenitors arise in the otic vesicle from ~E9 onwards under the control of  
67 NeuroD1 and differentiate into spiral ganglion neurons by E14.5<sup>22-25</sup>. However, the  
68 peripheral auditory circuit is only established in the first 10 days after birth (P0-P10), prior to  
69 the onset of hearing<sup>18,26,27</sup>. To assess *Chd7* function in spiral ganglion neurons, we analysed  
70 *NeuroD1Cre/+;Chd7floxed* mutants. In homozygous mutants, ganglion size and neuronal  
71 numbers are indistinguishable from controls at P1 (n=3/3; Figures 1o, S2a), but neurons  
72 degenerate rapidly to 50% by P7 (n=3/3; Figure 1o, p). This phenotype is also observed in  
73 *Chd7* heterozygous mutants, although neurodegeneration occurs gradually with 50% loss by  
74 P21 (n=3/3; Figure S2b). Thus, *Chd7* controls the survival of a subset of spiral ganglion  
75 neurons. Like in hair cells, *Chd7* deletion at embryonic stages does not affect neuronal  
76 development but leads to delayed neurodegeneration postnatally.

77 To determine whether *Chd7* deletion results in hearing loss, we measured the auditory  
78 brainstem response (ABR) of 4- and 8-week-old mutant and control animals. Most  
79 *Atoh1Cre/+;Chd7flox* homozygous mutants exhibit severe-profound hearing loss across all  
80 frequencies (n=6/7; Figure 2a, S3a), while only 1/7 heterozygous mutants show a similar  
81 ABR profile (Figure S3a). In contrast, *NeuroD1Cre/+;Chd7flox* mutants exhibit moderate  
82 hearing loss (n=6; Figure 2b, S5a), presumably due to surviving neurons. Nonetheless, the  
83 ABR tests confirm that SNHL correlates with hair cell or neuronal degeneration.

84 *Chd7* controls transcription through regulation of chromatin architecture<sup>13,15</sup>, but how it exerts  
85 its function in auditory hair cells and neurons is poorly understood. We therefore examined  
86 the earliest transcriptional changes resulting from *Chd7* deletion by comparing gene  
87 expression of FAC-sorted hair cells or spiral ganglia neurons from mutant and control  
88 animals (Figure 3a, Table S1, S4). Differential gene expression analysis reveals significant  
89 changes (FDR  $\leq 0.05$ , fold change  $> 2$ ) in 2437 transcripts in hair cells and 1653 transcripts in  
90 neurons (Figure 3b, Figure S4a-d, Tables S1-4). We validated expression changes of  
91 selected genes by qRT-PCR (Figure 3d) and protein by immunohistochemistry (Figure S5b).  
92 Analysis of Disease Ontology terms for all differentially expressed genes shows enrichment  
93 of *Chd7*-associated syndromes as well as hearing loss. Surprisingly, there is also a strong  
94 association with neurodegenerative diseases including dementia (Figure 3f, Tables S2, S4,  
95 S5, S6) pointing towards a common mechanism underlying these conditions.

96 Gene Ontology terms for RNA processing and stress pathways are strongly associated with  
97 all differentially expressed genes (Figure 3e, Table S3, S4), while RNA-binding proteins are  
98 among the most prominent transcripts deregulated by *Chd7* deletion (Figure 4). Indeed, in  
99 neuronal progenitors, *Chd7* binds to many of their promoters (Figure S4e, Table S9; ref. 11)  
100 suggesting direct regulation. RNA-binding proteins are critical regulators of cellular stress,  
101 controlling the assembly and disassembly of stress granules<sup>28-30</sup>. As transient membrane-  
102 less compartments, they assemble in the cytoplasm under oxidative stress conditions to

103 allow cells to survive, however their persistence triggers apoptosis<sup>1,28-31</sup>. The metabolic  
104 demands of sound detection and amplification elicits oxidative stress in neurons and hair  
105 cells that causes cell death unless tightly regulated<sup>32,33</sup>. We therefore tested the hypothesis  
106 that *Chd7* mutant hair cells are hypersensitive to oxidative stress by exploiting a cochlear  
107 explant system in which oxidative stress can be induced by treatment with  
108 aminoglycosides<sup>4,34,35</sup>. When P6 control explants from *Atoh1Cre/+;mTmG* mice are exposed  
109 to gentamicin for 5 hours (100µM), hair cells are intact along the entire length of the cochlea,  
110 as are untreated *Atoh1Cre/+;Chd7flox* homozygous mutant hair cells (n=5/5 each; Figure 5).  
111 In contrast, gentamicin treatment of mutant explants results in a reduction of hair cells by  
112 more than 50% across all regions of the cochlea (n=6/6; Figure 5). These findings show that  
113 *Chd7* mutant hair cells are hypersensitive to oxidative stress, causing degeneration in  
114 response to stress inducers. Thus, *in vivo* sound exposure at the onset of hearing may  
115 trigger cell death in *Chd7*-deficient hair cells. Our data suggest that SNHL in CHARGE  
116 syndrome may partly be due to mis-regulation of RNA-binding proteins as key regulators of  
117 stress granules thereby altering the response of neurons and hair cells to normal sound.

118 In summary, *Chd7* emerges as a key coordinator of cellular stress proteins. Its embryonic  
119 deletion leads to an imbalance in stress pathways that does not affect normal development  
120 of neurons or hair cells. However, as cells mature and encounter environmental stress, they  
121 begin to degenerate. Our findings suggest that some neurodegenerative diseases arise from  
122 neurodevelopmental abnormalities that go undetected, and that SNHL may be an early  
123 indicator for these conditions.

124

125 **Acknowledgments**

126 We thank Karen Steel and Claudio Stern for critical reading of the manuscript, Owen  
127 Harrison for excellent technical assistance, Zoe Mann and members of the Streit group for  
128 discussions. We thank Mary Beth Hatten for the *NeuroD1Cre* line. This work was supported  
129 by the MRC MR/R004625/1 and by Action on Hearing Loss (S39).

130

131 **Author contributions**

132 MA conceptualised and designed the study together with AB and AS. MA performed most  
133 experiments and data analysis; RM analysed the neuronal *Chd7* phenotype, while EJ  
134 performed ABR tests. RP assisted in sequencing alignment and bioinformatics. MA and AS  
135 wrote the manuscript.

136

137 **Competing interests**

138 The authors declare no competing interests.

## 139 **References**

- 140 1. Neal, M. & Richardson, J.R. Time to get personal: A framework for personalized targeting  
141 of oxidative stress in neurotoxicity and neurodegenerative disease. *Curr Opin Toxicol.* **7**,  
142 127-132 (2018).
- 143 2. Cheng, L. et al. Moderate noise induced cognition impairment of mice and its underlying  
144 mechanisms. *Physiol. Behav.* **104**, 981-988 (2011).
- 145 3. Fujimoto, C & Yamasoba, T. Oxidative stresses and mitochondrial dysfunction in age-  
146 related hearing loss. *Oxid Med Cell Longev.* **2014**, 582849 (2014).
- 147 4. Goncalves et al. Drug-induced stress granule formation protects sensory hair cells in  
148 mouse cochlear explants during ototoxicity. *Sci Rep.* **9**,12501 (2019).
- 149 5. Vissers, L.E. et al. Mutations in a new member of the chromodomain gene family cause  
150 CHARGE syndrome. *Nat. Genet.* **36**, 955–957 (2004).
- 151 6. Zentner, G.E., Layman, W.S., Martin, D.M. & Scacheri, P.C. Molecular and phenotypic  
152 aspects of CHD7 mutation in CHARGE syndrome. *Am. J. Med. Genet. A.* **152A**, 674–686  
153 (2010).
- 154 7. Bosman, E.A. et al. Multiple mutations in mouse Chd7 provide models for CHARGE  
155 syndrome. *Hum Mol Genet.* **14**, 3463-3476 (2005).
- 156 8. Randall, V. et L. Great vessel development requires biallelic expression of Chd7 and Tbx1  
157 in pharyngeal ectoderm in mice. *J Clin Invest.* **119**, 3301–3310 (2009).
- 158 9. Hurd, E.A. et al. The ATP-dependent chromatin remodeling enzyme CHD7 regulates pro-  
159 neural gene expression and neurogenesis in the inner ear. *Development.* **137**, 3139-3150  
160 (2010).
- 161 10. Hurd, E.A. et al. Mature middle and inner ears express Chd7 and exhibit distinctive  
162 pathologies in a mouse model of CHARGE syndrome. *Hear Res.* **282**, 184-195 (2011).
- 163 11. Engelen et al. Sox2 cooperates with Chd7 to regulate genes that are mutated in human  
164 syndromes. *Nat. Genet.* **43**, 607–611 (2011).

- 165 12. Jones, K.M. et al. CHD7 Maintains Neural Stem Cell Quiescence and Prevents  
166 Premature Stem Cell Depletion in the Adult Hippocampus. *Stem Cells*. **33**, 196–210 (2015).
- 167 13. Feng, W. et al. Chd7 is indispensable for mammalian brain development through  
168 activation of a neuronal differentiation programme. *Nat Commun*. **8**, 14758 (2017).
- 169 14. Donovan, A.P.A. et al. Cerebellar Vermis and Midbrain Hypoplasia Upon Conditional  
170 Deletion of Chd7 from the Embryonic Mid-Hindbrain Region. *Front Neuroanat*. **11**, 86 (2017).
- 171 15. Whittaker, D.E. et al. Distinct cerebellar foliation anomalies in a CHD7 haploinsufficient  
172 mouse model of CHARGE syndrome. *Am J Med Genet C Semin Med Genet*. **175C**, 465-477  
173 (2017).
- 174 16. Whittaker, D.E. et al. The chromatin remodeling factor CHD7 controls cerebellar  
175 development by regulating reelin expression. *J Clin Invest*. **127**, 874–887 (2017).
- 176 17. Dallos, P. et al. Prestin-based outer hair cell motility is necessary for mammalian  
177 cochlear amplification. *Neuron*. **58**, 333–339 (2008).
- 178 18. Koundakjian, E.J., Appler J.L., & Goodrich, L.V. Auditory neurons make stereotyped  
179 wiring decisions before maturation of their targets. *J Neurosci*. **27**, 14078–14088 (2007).
- 180 19. Chen, P. et al. The role of Math1 in inner ear development: Uncoupling the establishment  
181 of the sensory primordium from hair cell fate determination. *Development*. **129**, 2495-2505  
182 (2002).
- 183 20. Ahmed, M. et al. Eya1-Six1 interaction is sufficient to induce hair cell fate in the cochlea  
184 by activating Atoh1 expression in cooperation with Sox2. *Dev Cell*. **22**, 377–390 (2012).
- 185 21. Mikaelian, D., & Ruben R.J. Development of hearing in the normal Cba-J mouse:  
186 Correlation of physiological observations with behavioral responses and with cochlear  
187 anatomy. *Acta Otolaryngol*. **59**:451–461 (1965).
- 188 22. Kim, W.Y. et al. NeuroD-null mice are deaf due to a severe loss of the inner ear sensory  
189 neurons during development. *Development*. **128**, 417–426 (2001).



- 190 23. Evsen, L. et al. Progression of Neurogenesis in the Inner Ear Requires Inhibition of Sox2  
191 Transcription by Neurogenin1 and Neurod1. *J Neurosci.* **33**, 3879–3890 (2013).
- 192 24. Fritsch, B., Pirvola, U. and Ylikoski, J. Making and breaking the innervation of the ear:  
193 neurotrophic support during ear development and its clinical implications. *Cell Tissue Res.*  
194 **295**, 369-382 (1999).
- 195 25. Sanchez-Calderon, H., Milo, M., Leon, Y. and Varela-Nieto, I. A network of growth and  
196 transcription factors controls neuronal differentiation and survival in the developing ear. *Int. J.*  
197 *Dev. Biol.* **51**, 557-570 (2007).
- 198 26. Huang L.C. et al. Synaptic profiles during neurite extension, refinement and  
199 retraction in the developing cochlea. *Neural Dev.* B:38 (2012).
- 200 27. Michanski, S. et al. Mapping developmental maturation of inner hair cell ribbon synapses  
201 in the apical mouse cochlea. *Proc Natl Acad Sci.* **116**, 6415–6424 (2019).
- 202 28. Gilks, N. et al. Stress granule assembly is mediated by prion-like aggregation of TIA-1.  
203 *Mol Biol Cell.* **15**, 5383–5398 (2004).
- 204 29. Leeuw, F.D. et al. The cold-inducible RNA-binding protein migrates from the nucleus to  
205 cytoplasmic stress granules by a methylation-dependent mechanism and acts as a  
206 translational repressor. *Aging Cell.* **19**, e13136 (2020).
- 207 30. Gopal, P.P. et al. Amyotrophic lateral sclerosis-linked mutations increase the viscosity of  
208 liquid-like TDP-43 RNP granules in neurons. *Proc Natl Acad Sci.* **114**, 2466–2475 (2017).
- 209 31. Hansen, J.M., Jacob, B.R., & Piorczynski, T.D. Oxidative stress during development:  
210 Chemical-induced teratogenesis. *Curr Opin Toxicol.* **7**, 110-115 (2018).
- 211 32. Ohlemiller, K.K., Wright, J.S., & Dugan, L.L. Early elevation of cochlear reactive oxygen  
212 species following noise exposure. *Audiol Neurootol.* **4**, 229-36 (1999).

- 213 33. Henderson, D. et al. The role of oxidative stress in noise-induced hearing loss. *Ear*  
214 *hearing*. **27**, 1–19 (2006).
- 215 34. Hirose, K., Hokenbery, D.M., & Rubel, E.W. Reactive oxygen species in chick hair cells  
216 after gentamicin exposure in vitro. *Hear Res*. **104**, 1-14 (1997).
- 217 35. Towers, E.R. et al. Caprin-1 is a target of the deafness gene Pou4f3 and is recruited to  
218 stress granules in cochlear hair cells in response to ototoxic damage. *J Cell Sci*. **124**, 1145–  
219 1155 (2011).
- 220 36. Ohlemiller, K.K., & Gagnon M.P. Cellular Correlates of Progressive Hearing Loss in  
221 129S6/SvEv Mice. *J Comp Neurol*. **469**, 377–390 (2004).
- 222 37. Matei, V. et al. Smaller inner ear sensory epithelia in Neurog1 null mice are related to  
223 earlier hair cell terminal mitosis. *Dev Dyn*. **234**, 633–650 (2005).
- 224 38. Gong, S., et al. Targeting CRE recombinase to specific neuron populations with Bacterial  
225 Artificial Chromosome constructs. *Journal of Neuroscience* **27**, 9817-9823 (2007).
- 226 39. Muzumdar, M.D. et al. A global double-fluorescent Cre reporter mouse. *Genesis*. **45**,  
227 593-605 (2007).
- 228 40. Ingham, N.J., Pearson, S. & Steel, K.P. Using the Auditory Brainstem Response  
229 (ABR) to Determine Sensitivity of Hearing in Mutant Mice. *Curr Protoc Mouse Biol*. **1**, 279-  
230 287 (2011).
- 231 41. Afgan, E. et al. The Galaxy platform for accessible, reproducible and collaborative  
232 biomedical analyses: 2018 update. *Nucleic Acids Res*. **46**, W537–W544 (2018).
- 233 42. Kim, D., Langmead, B., & Salzberg, S.L. HISAT: a fast spliced aligner with low memory  
234 requirements. *Nature Methods*, **12**, 357-360 (2015).
- 235 43. Liao, Y., Gordon, K.S, & Shi, W. featureCounts: an efficient general purpose program for  
236 assigning sequence reads to genomic features. *Bioinformatics*. **30**, 923–930 (2014).

- 237 44. Love, M., Huber, W., & Anders, S. Moderated estimation of fold change and dispersion  
238 for RNA-seq data with DESeq2. *Genome Biology*. **15**, 550 (2014).

239 **Figures**

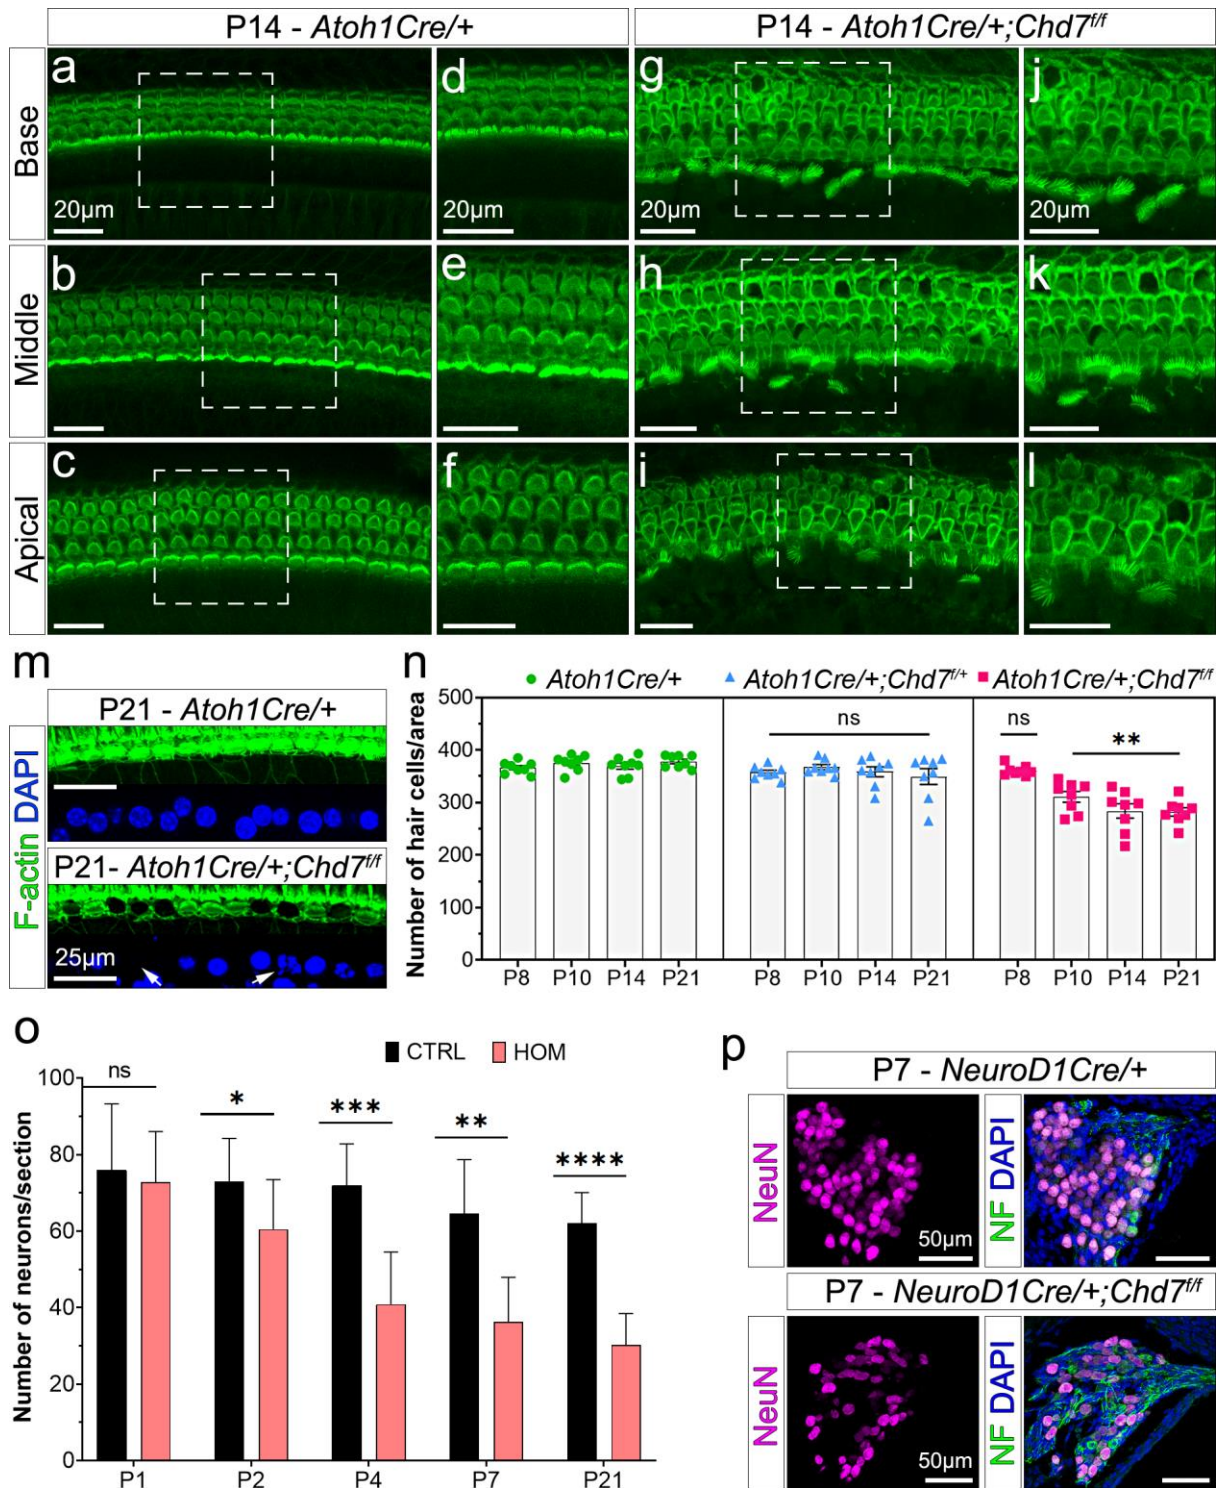

240

241 **Figure 1. Postnatal degeneration of hair cells and neurons in *Chd7* mutants. a-l, F-**

242 **actin-stained hair cells in the cochlea of control (a-f) and *Chd7* homozygous mutants (g-l) at**

243 P14. Dashed boxes in a-c and h-i indicate the zoomed regions shown in d-f and j-l. Scale  
244 bars = 20 $\mu$ m. **m**, Inner hair cells showing pyknotic, fragmented (arrow) and missing (arrow)  
245 nuclei in *Chd7* mutants at P21. Scale bars = 25 $\mu$ m. **n**, Average number of hair cells in three  
246 non-overlapping 200 $\mu$ m regions per base, middle and apical turn of each cochlea per animal  
247 (n=8 per genotype; each animal is represented by one circle, triangle or square). Separate  
248 inner and outer hair cell quantification is provided in Figure S2. Statistical significance was  
249 obtained by performing a nested one-way ANOVA and Dunnett's multiple comparison test. \*\*  
250 P-value = 0.005. **o**, Average number of neurons in the spiral ganglion per section at different  
251 postnatal stages in control (CTRL) and *Chd7* homozygous mutants (HOM). **p**, Spiral ganglia  
252 neurons stained with NeuN and neurofilament (NF) at P7 in control and mutant animals (t  
253 test, P-values: \* $\leq$ 0.05, \*\* $\leq$ 0.005, \*\*\* $\leq$ 0.0005, \*\*\*\* $\leq$ 0.00005). Scale bars = 50 $\mu$ m.

254

255

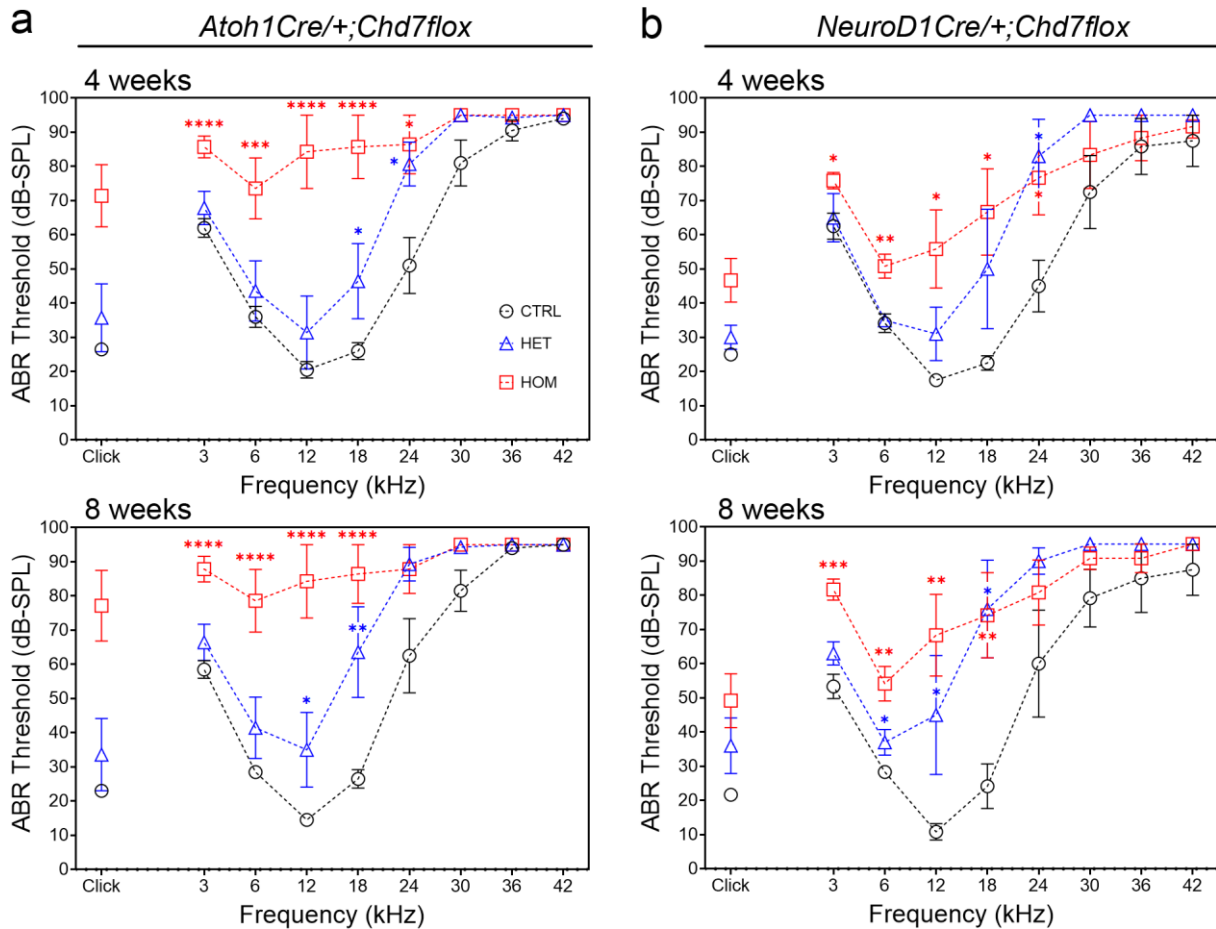

256 **Figure 2. Chd7 mutants are hearing impaired.** **a**, Auditory brainstem response (ABR) tests  
 257 of *Atoh1Cre+;Chd7flox* mutants and controls at 4 weeks and 8 weeks reveals profound  
 258 hearing loss in homozygous and mild-moderate hearing loss in heterozygous *Chd7* mutants  
 259 across all frequencies. **b**, ABR tests of *NeuroD1Cre+;Chd7flox* mutants and controls at 4  
 260 weeks and 8 weeks reveals mild-moderate hearing loss in homozygous mutants.  
 261 Frequencies where significant threshold elevations were observed are indicated by asterisks  
 262 (P-values: \* < 0.05, \*\* < 0.005, \*\*\* < 0.0005, \*\*\*\* < 0.000005). See Figures S5 and S6 for ABR  
 263 profiles of each mouse. Error bars represent the standard error of mean (see Figures S5 and  
 264 S6). CTRL = control; HET = heterozygote; HOM = homozygote.

265

266

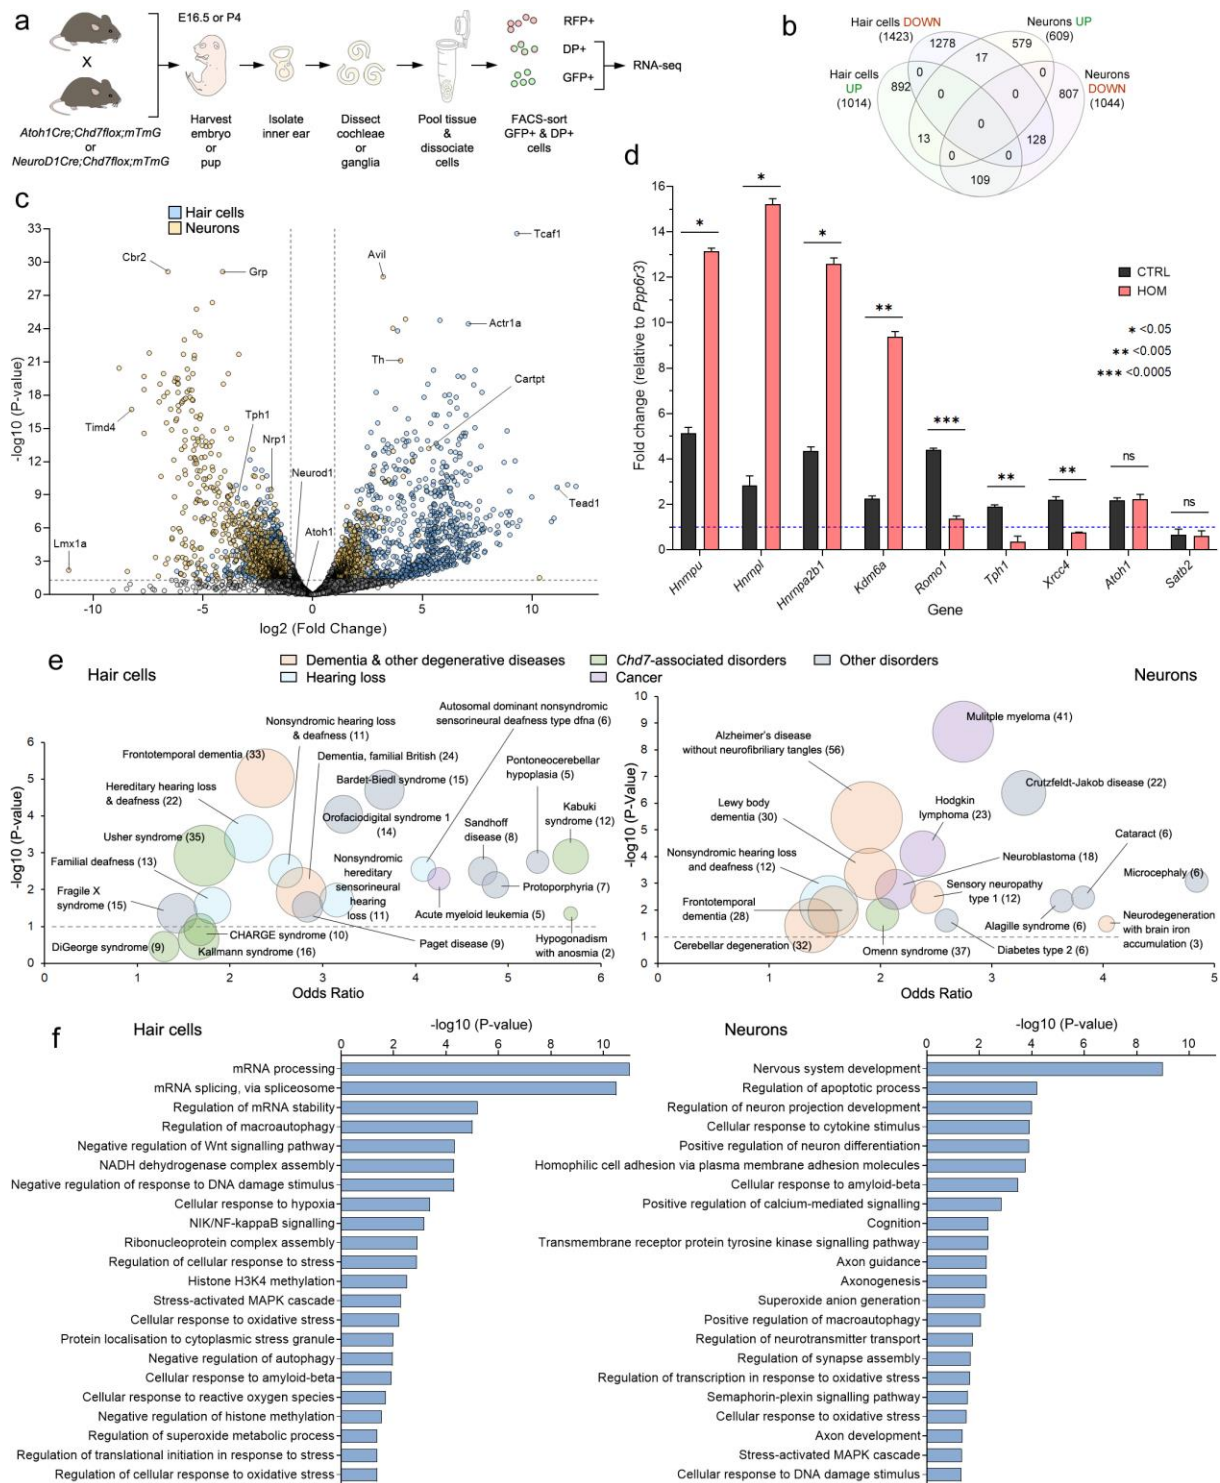

267

268 **Figure 3. Transcriptome analysis of control and *Chd7* mutant hair cells and neurons**

269 **reveals misregulation of cellular stress pathways. a, Schematic showing the**

270 **experimental approach used for RNA sequencing. DP = double positive. n=6 cochleae or**

15

271 ganglia were pooled for RNA-seq in three independent experiments per genotype. **b**,  
272 Comparison of the number of differentially expressed genes between hair cells and neurons  
273 in homozygotes. **c**, Volcano plot displaying genes that are unaffected (grey) and significantly  
274 differentially expressed (adjusted P-value <0.05, fold change >2) in hair cells (blue) and  
275 neurons (amber). **d**, qPCR expression analysis of genes in controls and homozygous FAC-  
276 sorted hair cells at E16.5. Error bars represent the standard error. P-values: \*=<0.05,  
277 \*\*<0.005, \*\*\*<0.0005. ns = not significant. **e**, Plot of Odds ratio by -log<sub>10</sub> of the P-value for  
278 human diseases identified by disease ontology. Complete disease ontology is provided in  
279 Tables S5 and S6. **f**, Gene ontology for differentially regulated genes. Complete gene  
280 ontology is provided in Tables S7 and S8.

281



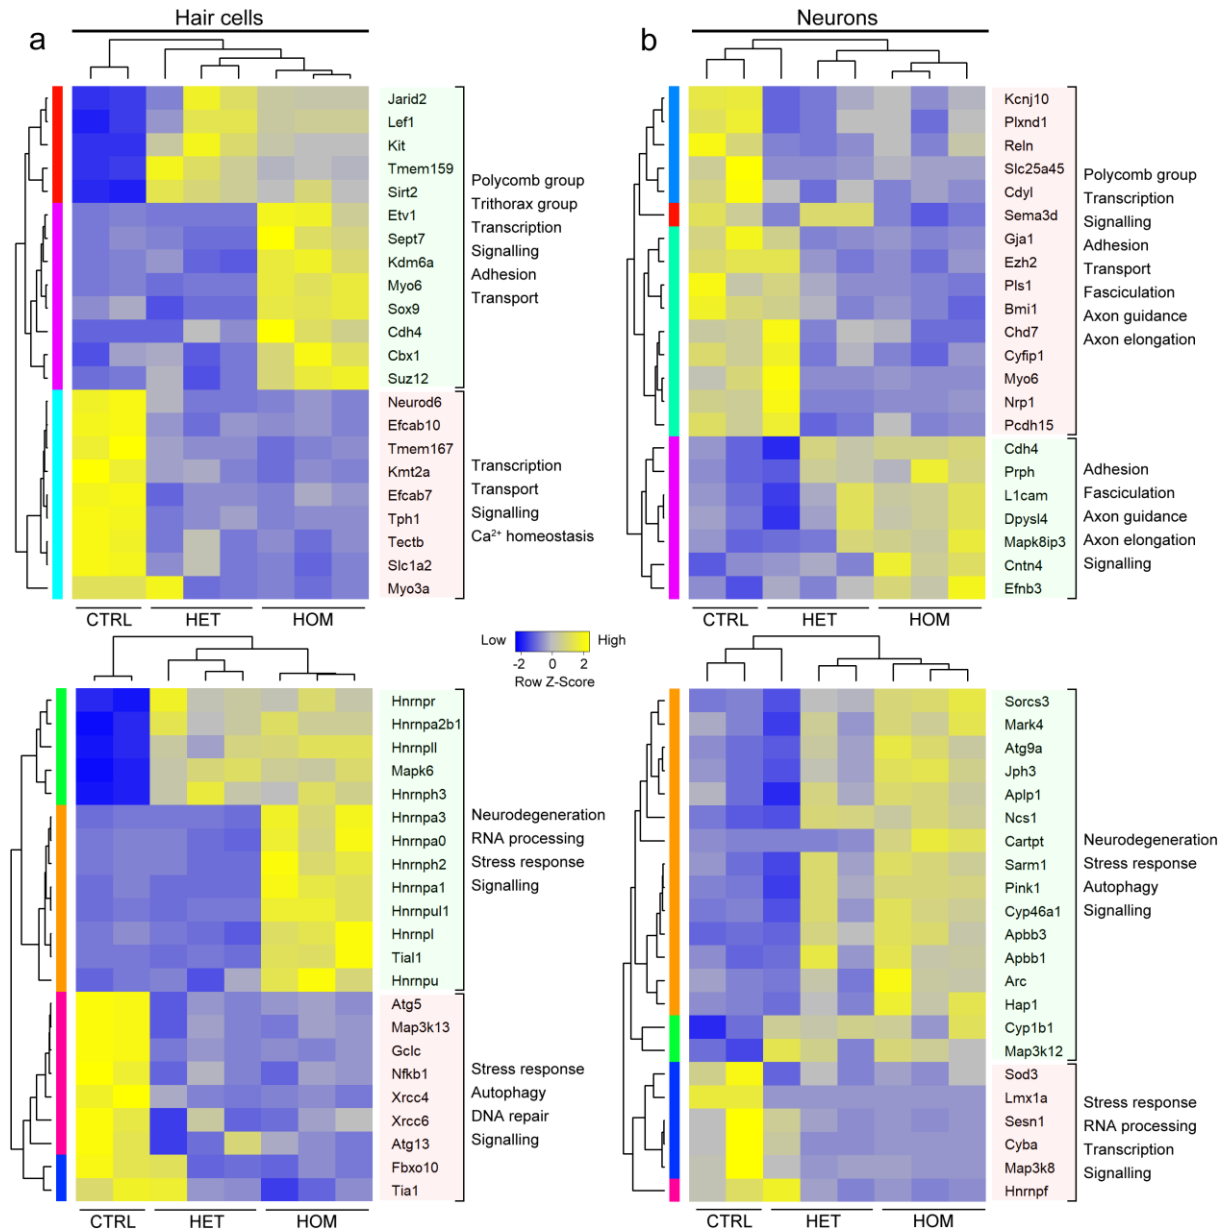

282

283 **Figure 4. Chd7 regulates RNA-splicing and stress pathway genes. a,**

284 representative functional categories of differentially expressed genes in hair cells. **b,**

285 Heatmap of representative functional categories of differentially expressed genes in neurons.

286 Highlighted blocks of genes: green = upregulated; red = downregulated.

287

288

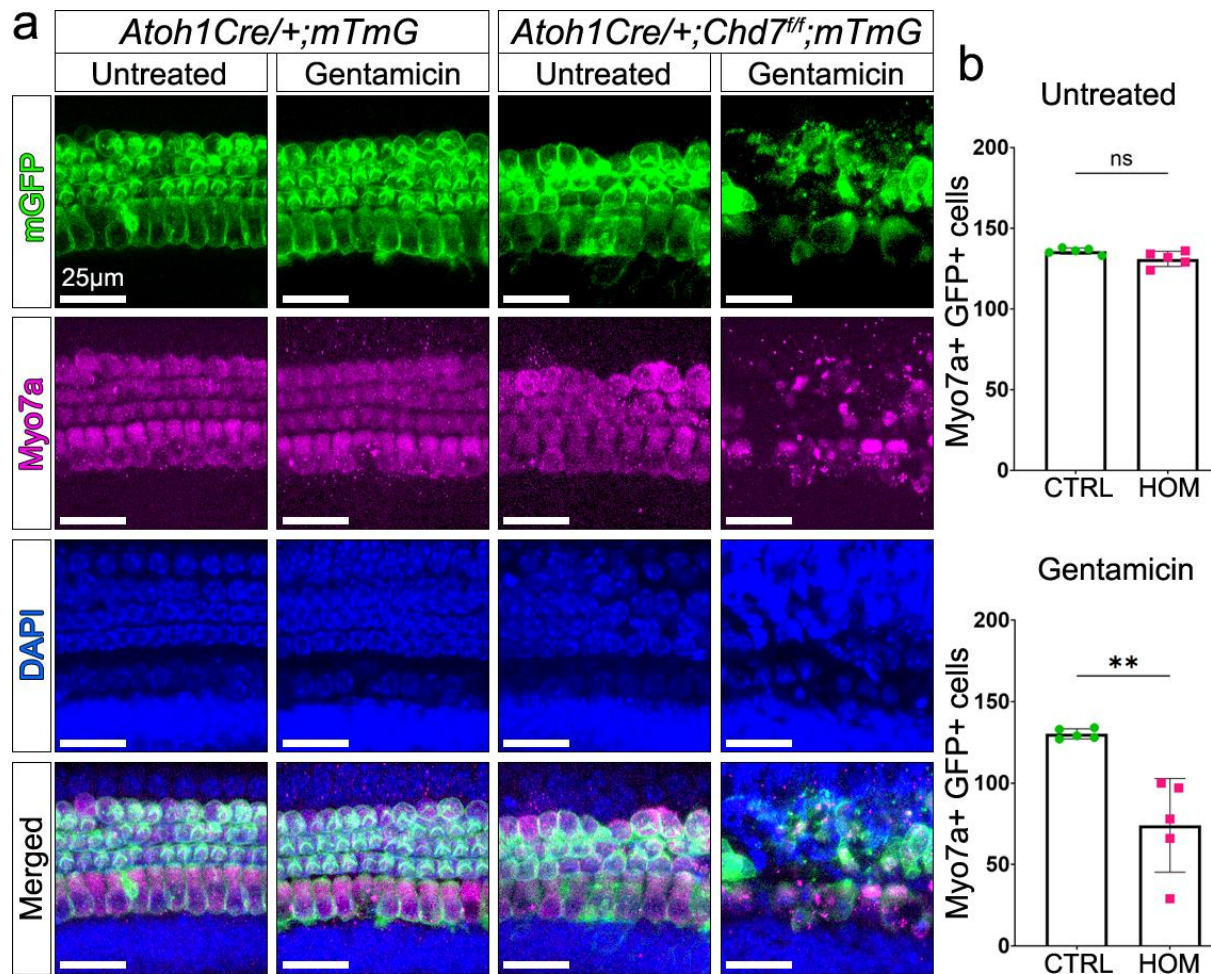

289 **Figure 5. *Chd7* mutant hair cells are hypersensitive to stress. a,** Cochlear explants of  
 290 control and *Chd7* homozygous mutants were treated with gentamicin to induce oxidative  
 291 stress. Rapid hair cell death is observed in mutants within 5 hours whereas control hair cells  
 292 and untreated mutant hair cells survive. Green = Cre recombined cells expressing  
 293 membrane GFP, magenta = all hair cells stained with Myo7a, blue = DAPI stained nuclei. **b,**  
 294 Quantification of Myo7a+ and GFP+ hair cells per 200µm region in untreated and treated  
 295 explants in both controls (CTRL) and mutants (HOM). Two-tailed unpaired t test shows  
 296 significant difference between mutant and control. P-value = 0.0025. Scale bars = 25µm.

## 297 **Methods**

### 298 **Animals**

299 The *Atoh1Cre* (B6.Cg-Tg(Atoh1-cre)1Bfri)<sup>37</sup>, *Chd7flox* (B6.tm1c(EUCOMM)Wtsi)<sup>12</sup> and  
300 *NeuroD1Cre* (B6.Cg-Tg(NeuroD1-cre)RZ24Gsat<sup>38</sup> mice were maintained on a C57BL/6J  
301 genetic background. The *mTmG* (*tm4(ACTB-tdTomato,-EGFP)Luo*)<sup>39</sup> mice were maintained  
302 on a 129S6/SvEv background. The *Atoh1CreERT2* (Tg(Atoh1-cre/Esr1\*)14Fsh, JAX  
303 #007684) used in Figure S4 was maintained on an FVB/NJ background. The *Chd7floxed*  
304 mice were crossed with the relevant Cre/reporter lines and backcrossed to C57BL/6J for  
305 three generations. All mice were maintained in either C57BL/6J or mixed genetic  
306 background. For tamoxifen-induced Cre recombination, a single dose of 20mg/ml tamoxifen  
307 (Sigma, T5648) dissolved in corn oil (Sigma, C8267) was administered to pregnant  
308 *Atoh1CreERT2;Chd7flox;mTmG* dams (80mg/kg of body weight) by intraperitoneal injection.  
309 To minimise abortion, 10mg/ml of progesterone (Sigma: P0130) was simultaneously  
310 administered at half tamoxifen dose (40mg/kg of body weight). One injection gave a  
311 consistent recombination efficiency of 95-99%. Upon Cre-mediated recombination, targeted  
312 cells expressed membrane GFP. All animal work was performed in accordance with UK  
313 Home Office regulations. Experiments were performed on male and female littermates and  
314 animals were randomly allocated to experimental groups.

### 315 **Immunohistochemistry**

316 Dissected inner ear tissue was fixed in 4% paraformaldehyde (PFA) in phosphate buffered  
317 saline (PBS) and processed for whole mount immunostaining or frozen sectioning. For  
318 whole-mount immunostaining, following permeabilisation with 0.2% Triton X-100/PBS (3 x 10  
319 minutes) and blocking with 0.2% Triton X-100/5% serum/PBS (1 hour), the cochleae were  
320 incubated overnight at 4°C in primary antibodies and then washed in 0.2% Triton X-100 (3 x  
321 10 minutes). Fluorescent secondary antibodies were applied for 1 hour at room temperature.

322 After staining with DAPI, the cochleae were washed extensively prior to mounting onto slides  
323 in 50% glycerol/PBS. For immunostaining on cryoprotected sections, following washes in  
324 PBS (2 x 10 minutes), permeabilisation in 0.1% TritonX-100/PBS (1 x 10 minutes) and  
325 blocking in 0.1% TritonX-100/5% serum/PBS (30 minutes), sections were incubated  
326 overnight at 4°C with primary antibodies. After several washes in 0.1% TritonX-100/PBS, the  
327 sections were incubated for 1 hour at room temperature with fluorescent secondary  
328 antibodies, subsequently washed in PBS, stained with DAPI and mounted onto slides with  
329 50% glycerol/PBS. Primary antibodies used were: rabbit Myo7a (1:1000, Proteus, 25-6790);  
330 rabbit NeuN (1:1000, Abcam, ab177487); mouse NF-M (1:200, ThermoFisher Scientific, 13-  
331 0700); rabbit Sptbn1 (1:500, Bethyl Laboratories, A300-936A); rabbit Lmx1a (1:100, Abcam,  
332 ab139726); rabbit Epha3 (1:100, St John's Laboratory, STJ110712). Secondary antibodies  
333 were: goat anti-rabbit Alexa Fluor 635 (1:500, Invitrogen, A31576); goat anti-mouse Alexa  
334 Fluor 488 (1:1000, Invitrogen, A11001). F-actin were stained with Phalloidin 488 (1:1000,  
335 Invitrogen, A12379) or 546 (1:500, Invitrogen, A22283).

### 336 **Auditory Brainstem Response (ABR)**

337 ABR measurements were performed as described in ref. 40. An audiometric profile for each  
338 mouse at 4 and 8 weeks old was obtained across a range of sound frequencies (3, 6, 12, 18,  
339 24, 30, 36 and 42 kHz). The mice were on a mixed genetic background (C57BL/6J x  
340 129S6/SvEv). Statistical significance was obtained using Kruskal-Wallis non-parametric  
341 ANOVA and Bonferroni-corrected significance in GraphPad Prism 9.0.0.121.

### 342 **Isolation of hair cells and neurons by FAC-sorting**

343 For RNA-sequencing, samples were collected for three biological replicates on independent  
344 occasions. E16.5 cochlear duct from *Atoh1Cre;Chd7flox* mice or P4 spiral ganglia neurons  
345 from *NeuroD1Cre;Chd7flox* mice were isolated from inner ears in cold L-15 medium  
346 (Thermofisher, 21083027). Tissues were cut into 3-6 pieces depending on stage and

347 collected into low-binding tubes with L-15 on ice. Per experiment, a total of 6 cochleae or  
348 ganglia from three siblings were pooled into one tube. Excess L-15 was removed and 100µl  
349 of 20U/ml Papain (27mg/ml, Sigma, P3125) and 1U/ul RNase-free DNase (Promega,  
350 M6101) in L-15 medium was added to each tube. Cells were dissociated at 37°C in a heated  
351 shaker, triturating using a filtered low-binding tip (Alpha Laboratories, LP200NFRS) every 5  
352 minutes for a total of 40 minutes for hair cells and 1 hour for neurons. The dissociation  
353 reaction was stopped by adding 1:1 volume of prewarmed sample buffer (1% fetal bovine  
354 serum in L-15). Cells were strained using a 40µm nylon sterile cell strainer (Falcon, 352340)  
355 into a 50ml low-binding tube (VWR, 5250403) and transferred to a 5ml FACS tube (Falcon,  
356 352235). DAPI (1mg/ml) was added (1:1000) immediately prior to FAC-sorting using the BD  
357 FACS Aria sorters into 1.5ml low-binding tubes with 100µl of sample buffer. FAC-sorted cells  
358 were centrifuged at 4°C for 4 minutes at 8000 relative centrifugal force (Eppendorf centrifuge  
359 54415R), frozen in liquid nitrogen and stored at -80°C or immediately processed for RNA  
360 extraction and first strand cDNA synthesis.

### 361 **RNA purification, library preparation and RNA Sequencing**

362 FACS-sorted cells were processed using the NEB Monarch kit (T2010S/L) for polyA+ RNA  
363 isolation and NEBNext Single Cell/Low Input RNA Library Prep Kit for Illumina (E6420S/L)  
364 and NEBNext Multiplex Oligos for Illumina (Index Primers Set 1, E7335S/L) was used for  
365 library preparation (as per kit instructions). RNA and cDNA quality were analysed using  
366 Agilent Total RNA 6000 Pico or High Sensitivity DNA Assay on a Bioanalyser (Agilent, 2100).  
367 Additional library quality control was performed by the Oxford Genomic Centre at the  
368 Wellcome Centre for Human Genetics (funded by the Wellcome Trust, grant 203141/Z/16/Z)  
369 and sequenced using Illumina HiSeq 4000 75bp paired-end reads. Following quality control,  
370 paired reads were aligned to mouse MM10 genome assembly. Alignment was performed  
371 using HiSAT2 version 2.1.0 with the default parameters in Galaxy version 2.1.0<sup>41,42</sup>. To

372 facilitate quantitative gene expression analysis, aligned reads for each sample were counted  
373 using featureCounts version 1.6.4<sup>43</sup>.

#### 374 **Differential gene expression analysis**

375 Differential gene expression analysis was performed using DESeq2 version 2.11.40.6,  
376 applying parametric fit<sup>44</sup>. Prior to differential gene expression analysis, a number of filters  
377 were applied. We considered the RPKM values of genes that are not normally expressed in  
378 E16.5 hair cells (i.e., *Satb2*) or P4 spiral ganglia neurons (i.e., *Atoh1*) and removed all genes  
379 with an RPKM value equivalent to or less than *Satb2* or *Atoh1*. This resulted in 6910  
380 transcripts for genes expressed in hair cells and 11293 genes expressed in neurons. We  
381 performed a pairwise comparison between controls and homozygotes and controls and  
382 heterozygotes. Considering an adjusted p-value (FDR) of  $\leq 0.05$  and linear fold change of  $> 2$   
383 in either direction, we found a total of 2437 genes in hair cells (1014 upregulated, 1423  
384 downregulated) and 1653 genes in neurons (609 upregulated, 1044 downregulated) that  
385 were differentially expressed in *Chd7* homozygous mutants compared to controls (Figure 3b,  
386 Tables S1-4, see Figure S7a-d for heterozygotes).

387 Gene Ontology and Disease Ontology analysis were performed both separately and together  
388 on up- or downregulated genes using the R interface ([https://cran.r-](https://cran.r-project.org/web/packages/enrichR/vignettes/enrichR.html)  
389 [project.org/web/packages/enrichR/vignettes/enrichR.html](https://cran.r-project.org/web/packages/enrichR/vignettes/enrichR.html)) to the Enrichr  
390 (<https://maayanlab.cloud/Enrichr/>) databases (see Tables S5-8 for specific databases for  
391 each analysis). Heatmaps and bubble plots were generated with the R packages *pheatmap*  
392 and *GOplot*. Volcano plots were generated in GraphPad Prism 9.0.0.121.

#### 393 **Quantitative (q) RT-PCR**

394 cDNA from RNA extracted from FAC-sorted hair cells or neurons were subjected to qPCR  
395 analysis with the AriaMx Real-Time PCR System (Agilent Technologies) using SYBR green  
396 and gene specific primers. Reactions were repeated in triplicates. Relative expression levels

397 were calculated using  $2^{-\Delta\Delta CT}$  method using *Ppp6r3* as an endogenous housekeeping gene.  
398 Differences between experimental groups were compared using an unpaired two-tailed  
399 Student's t-test and P-value  $\leq 0.05$  was considered statistically significant.

#### 400 **Cochlear explants**

401 Cochlear explants from postnatal day 6 *Atoh1Cre;mTmG* and *Atoh1Cre;Chd7ff;mTmG* mice  
402 were cultured in MatTek dishes coated with CellTak (BD Biosciences). Culture medium  
403 comprised of L-15 medium (Thermofisher, 21083027), 5% FBS, 0.2% N2, and 0.001%  
404 ciprofloxacin. Explants were maintained at 37°C under 5% CO<sub>2</sub> for 1 hr prior to gentamicin  
405 exposure. Explants were incubated with or without 100µM gentamicin for 5 hours. At 5 hours,  
406 explants were rinsed in PBS, fixed in 4% PFA (20 minutes at room temperature) and rinsed  
407 again in PBS (3 x 10 minutes) prior to immunohistochemistry. Experiments were performed  
408 on explants of basal and middle turns of the cochlea.

#### 409 **Microscopy and Imaging**

410 Confocal z stack images were obtained using a TCS SP5 confocal (Leica) microscope,  
411 projected using Fiji and further processed using Photoshop (Adobe). Figures were  
412 assembled in Photoshop.

#### 413 **Quantification and statistical analysis**

414 Statistical significance for hair cell and neuronal quantification was obtained by performing  
415 one-way ANOVA and Dunnett's multiple comparison test or paired t-test. Differences  
416 between experimental groups in Figure 5 were compared using two-tailed unpaired t-tests.  
417 All statistical tests were conducted using Microsoft Excel and GraphPad Prism 9.0.0.121.

#### 418 **Data availability**

419 RNA-seq data are on the Gene Expression Omnibus, GEO: GSE163798.
